# Supplementary material
Source: publisher figshare collection journal article supplement (https://karger.figshare.com/ndownloader/files/17616740)
Supplement: Supplementary file 1 [file 17616740]

STROBE Statement—Checklist of items that should be included in reports of ***cohort studies***

|  | Item No | Recommendation | Reported on manuscript page |
| --- | --- | --- | --- |
| **Title and abstract** | 1 | (*a*) Indicate the study’s design with a commonly used term in the title or the abstract | Page 1-3 |
| (*b*) Provide in the abstract an informative and balanced summary of what was done and what was found | Page 1-3 |
| Introduction | | |  |
| Background/rationale | 2 | Explain the scientific background and rationale for the investigation being reported | Page 4 |
| Objectives | 3 | State specific objectives, including any prespecified hypotheses | Page 5-6 |
| Methods | | |  |
| Study design | 4 | Present key elements of study design early in the paper | Page 5 line 103-104 |
| Setting | 5 | Describe the setting, locations, and relevant dates, including periods of recruitment, exposure, follow-up, and data collection | Page 5 line 103-116, Page 6 line 124-137, 138-148  Page 7 line 161-163 |
| Participants | 6 | (*a*) Give the eligibility criteria, and the sources and methods of selection of participants. Describe methods of follow-up | Page 5 line 103-116  Page 7 line 161-163 |
| (*b*)For matched studies, give matching criteria and number of exposed and unexposed | Page 5 line 116  Page 6 line 117-120 |
| Variables | 7 | Clearly define all outcomes, exposures, predictors, potential confounders, and effect modifiers. Give diagnostic criteria, if applicable | Page 5 line 106-109  Page 6 line 124-137  Page 7 line 149-161 |
| Data sources/ measurement | 8* | For each variable of interest, give sources of data and details of methods of assessment (measurement). Describe comparability of assessment methods if there is more than one group | Page 6 line 124-145  Page 7 line 146-148 |
| Bias | 9 | Describe any efforts to address potential sources of bias | Page 5 line 116  Page 6 line 117-120  Page 7 line 147-148 |
| Study size | 10 | Explain how the study size was arrived at | Page 5 line 103-111 |
| Quantitative variables | 11 | Explain how quantitative variables were handled in the analyses. If applicable, describe which groupings were chosen and why | Page 7 line 166-169 |
| Statistical methods | 12 | (*a*) Describe all statistical methods, including those used to control for confounding | Page 7 line 165-174  Page 8 line 175-182 |
| (*b*) Describe any methods used to examine subgroups and interactions |
| (*c*) Explain how missing data were addressed |
| (*d*) If applicable, explain how loss to follow-up was addressed |
| (*e*) Describe any sensitivity analyses |
| Results | | |  |
| Participants | 13* | (a) Report numbers of individuals at each stage of study—eg numbers potentially eligible, examined for eligibility, confirmed eligible, included in the study, completing follow-up, and analysed | Page 7 line 162-163  Page 8 line 185-189  Figure 1 Inclusion flowchart |
| (b) Give reasons for non-participation at each stage |
| (c) Consider use of a flow diagram |
| Descriptive data | 14* | (a) Give characteristics of study participants (eg demographic, clinical, social) and information on exposures and potential confounders | Page 8 line 184-193  Table 1 and supplemental Table 1  Page 8 line 195-199  Page 9 line 204, line 229-230  Page 10 line 235-236, line 247 |
| (b) Indicate number of participants with missing data for each variable of interest |
| (c) Summarise follow-up time (eg, average and total amount) |
| Outcome data | 15* | Report numbers of outcome events or summary measures over time | Page 7 line 161-163  Page 8 line 185-189. Line 194-202  Page 9 line 203-212 |
| Main results | 16 | (*a*) Give unadjusted estimates and, if applicable, confounder-adjusted estimates and their precision (eg, 95% confidence interval). Make clear which confounders were adjusted for and why they were included | Page 8 line 194-202  Page 9 line 203-227  Table 2 and supplemental Table 2  Fig 2 and Fig 3 |
| (*b*) Report category boundaries when continuous variables were categorized |
| (*c*) If relevant, consider translating estimates of relative risk into absolute risk for a meaningful time period |
| Other analyses | 17 | Report other analyses done—eg analyses of subgroups and interactions, and sensitivity analyses | Page 9 line 228-230  Page 10 line 231-258  Page 11 line 259-262  Table 3,Supplementary Table 1, Supplementary Table 2 and Supplementary Table 3 |
| Discussion | | |  |
| Key results | 18 | Summarise key results with reference to study objectives | Page 11 line 265-270 |
| Limitations | 19 | Discuss limitations of the study, taking into account sources of potential bias or imprecision. Discuss both direction and magnitude of any potential bias | Page 13 line 337-345  Page 14 line 346-347 |
| Interpretation | 20 | Give a cautious overall interpretation of results considering objectives, limitations, multiplicity of analyses, results from similar studies, and other relevant evidence | Page 11 line 272-287  Page 12 line 282-317  Page 13 line 318-319 |
| Generalisability | 21 | Discuss the generalisability (external validity) of the study results | Page 13 line 321-336 |
| Other information | | |  |
| Funding | 22 | Give the source of funding and the role of the funders for the present study and, if applicable, for the original study on which the present article is based | Page 1 line 20 |

*Give information separately for exposed and unexposed groups.

**Note:** An Explanation and Elaboration article discusses each checklist item and gives methodological background and published examples of transparent reporting. The STROBE checklist is best used in conjunction with this article (freely available on the Web sites of PLoS Medicine at http://www.plosmedicine.org/, Annals of Internal Medicine at http://www.annals.org/, and Epidemiology at http://www.epidem.com/). Information on the STROBE Initiative is available at http://www.strobe-statement.org.
